1 **Title:** Genetic variation for mitochondrial function in the New Zealand freshwater snail  
2 *Potamopyrgus antipodarum*

3  
4 **Authors:** Joel Sharbrough<sup>1,3</sup>, Jennifer L. Cruise<sup>2</sup>, Megan Beetch<sup>2</sup>, Nicole M. Enright<sup>1</sup>, &  
5 Maurine Neiman<sup>1</sup>

6  
7 <sup>1</sup> University of Iowa, Department of Biology, 143 Biology Building, Iowa City, IA 52242

8 <sup>2</sup> University of St. Thomas, Department of Biology, 2115 Summit Ave., Saint Paul, MN 55105

9 <sup>3</sup> Colorado State University, Department of Biology, Anatomy-Zoology Building E212, Fort  
10 Collins, CO 80523

11  
12 **Corresponding Author:**

13  
14 Joel Sharbrough  
15 Colorado State University, Department of Biology  
16 Anatomy-Zoology Building E212  
17 Fort Collins, CO 80523  
18 Email: jsharbro@rams.colostate.edu  
19 Phone: (970) 491-2256

20  
21 **Other Contact Information:**

22 Jennifer L. Cruise: jlcrui@stthomas.edu  
23 Megan Beetch: mbeetch@purdue.edu  
24 Nicole M. Enright: enrightnm@g.cofc.edu  
25 Maurine Neiman: maurine-neiman@uiowa.edu

26  
27 **Running Title:** Asexual lineages vary in mitochondrial function

28  
29 **Article Type:** Original Article

30 **ABSTRACT**

31 The proteins responsible for mitochondrial function are encoded by two different genomes with  
32 distinct inheritance regimes, rendering rigorous inference of genotype–phenotype connections  
33 intractable for all but a few model systems. Asexual organisms provide a powerful means for  
34 addressing these challenges because offspring produced without recombination inherit both  
35 nuclear and mitochondrial genomes from a single parent. As such, these offspring inherit  
36 mitonuclear genotypes that are identical to the mitonuclear genotypes of their parents and  
37 siblings and different from those of other asexual lineages. Here, we compared mitochondrial  
38 function across distinct asexual lineages of *Potamopyrgus antipodarum*, a New Zealand  
39 freshwater snail model for understanding the evolutionary consequences of asexuality. Our  
40 analyses revealed substantial phenotypic variation across asexual lineages at three levels of  
41 biological organization: mitogenomic, organellar, and organismal. These data demonstrate that  
42 different asexual lineages have different mitochondrial function phenotypes and that there exists  
43 heritable variation (that is, the raw material for evolution) for mitochondrial function in *P.*  
44 *antipodarum*. The discovery of this variation combined with the methods developed here sets the  
45 stage to use *P. antipodarum* to study central evolutionary questions involving mitochondrial  
46 function, including whether mitochondrial mutation accumulation influences the maintenance of  
47 sexual reproduction in natural populations.

48  
49 **Keywords:** Cellular respiration, oxygen consumption, mitochondrial function, asexual  
50 reproduction, mtDNA copy number, mitochondrial membrane potential

## 51 INTRODUCTION

52 Mitochondrial function is of critical importance to eukaryotic health (for example, Chen *et al.*,  
53 2007; Dowling, 2014), and genetic variation for mitochondrial function has been linked to  
54 evolutionary adaptation (for example, Rawson and Burton, 2002) and disease (DiMauro and  
55 Schon, 2001). The role of genetic variation for mitochondrial function is complicated by direct  
56 interaction between nuclear encoded and mitochondrially encoded proteins, particularly with  
57 respect to oxidative phosphorylation (OXPHOS) (reviewed in Rand *et al.*, 2004). Successful  
58 mitonuclear interaction is particularly important for proper enzyme function in OXPHOS  
59 complexes I, III, IV, and V because these complexes are composed of subunits encoded by both  
60 genomes. Accordingly, discordance between mitochondrial and nuclear genomes has been  
61 demonstrated to have negative fitness and/or functional consequences in a variety of animals,  
62 including copepods (Ellison and Burton, 2006), *Drosophila* (Meiklejohn *et al.*, 2013; Pichaud *et*  
63 *al.*, 2013), seed beetles (Dowling *et al.*, 2007), and salamanders (Lee-Yaw *et al.*, 2014).

64 In sexually reproducing organisms, the maintenance of mitonuclear compatibility is  
65 further complicated by the expectation that the different mechanisms of nuclear *vs.*  
66 mitochondrial genome (mtDNA) inheritance will differentially affect the generation,  
67 maintenance, and distribution of genetic variation. In particular, biparental inheritance and  
68 meiotic recombination in the nuclear genome should increase effective population size relative to  
69 the (typically) uniparentally inherited and non-recombinant mtDNA (reviewed in Barr *et al.*,  
70 2005; Neiman and Taylor, 2009). This logic is the basis for the expectation that mtDNA will,  
71 when compared to the nuclear genome, experience reduced efficacy of selection and suffer an  
72 increased rate of accumulation of mildly deleterious mutations (reviewed in Neiman and Taylor,

73 2009). This mechanism is also thought to generate selection favoring compensatory changes in  
74 nuclear-encoded mitochondrial subunits (Sloan *et al.*, 2013; Zhang and Broughton, 2013).

75         Asexual taxa provide a particularly interesting context in which to evaluate mitochondrial  
76 function and evolution because the absence of recombination and segregation in asexually  
77 inherited nuclear genomes means that asexual lineages will transmit their mtDNA in complete  
78 linkage disequilibrium (LD) with the nuclear genome. To date, inbred sexual lineages have been  
79 the primary genetic tool used to investigate genotype-phenotype connections relating to  
80 mitochondrial function (for example, Ellison and Burton, 2006; Montooth *et al.*, 2010; Latorre-  
81 Pellicer *et al.*, 2016). While these studies are powerful, the inferences that they generate are in  
82 part limited by the fact that inbreeding can introduce other off-target effects (for example,  
83 inbreeding depression, purging of harmful recessive mutations). Alternatively, full-factorial  
84 crossing of mtDNA onto various nuclear backgrounds (Willett and Burton, 2003; Dowling *et al.*,  
85 2007), perhaps represents the best of both worlds, but it is not tenable for species with long  
86 generation times. These challenges can be circumvented in asexual lineages, in which  
87 mitonuclear LD can be used as a relatively straightforward means of exploring genotype-  
88 phenotype connections in natural populations. This asexual-focused approach also has the  
89 substantial additional benefit of providing information relevant to understanding how sexual  
90 reproduction (and its absence) influences mitochondrial function.

91         *Potamopyrgus antipodarum*, a New Zealand freshwater snail, is very well suited for  
92 investigating mitochondrial function in the absence of sex because obligately sexual and  
93 obligately asexual individuals frequently coexist in natural populations (Lively 1987). Multiple  
94 separate transitions from sexual ancestor to asexual descendent have occurred within this species,  
95 providing many so-called “natural experiments” into the consequences of asexuality (Neiman *et*

96 *al.*, 2011; Paczesniak *et al.*, 2013). Asexuality in *P. antipodarum* appears to occur via apomictic  
97 parthenogenesis (Phillips and Lambert, 1989), meaning that asexually produced offspring inherit  
98 both their nuclear and mtDNA from a single parent and that the nuclear genome is transmitted  
99 without recombination. The implications are that *P. antipodarum* individuals descended from the  
100 same mother (what we term "asexual lineages") should share the same mitonuclear genotype,  
101 barring *de novo* mutations.

102         Here, we use a common-garden approach, which isolates genetic (*vs.* environmental)  
103 effects on phenotypic variation, to test whether distinct asexual lineages of *P. antipodarum* (our  
104 proxy for mitonuclear genotype) vary in mitochondrial function at three distinct levels of  
105 biological organization: (1) mitogenomic (mtDNA copy number), (2) organellar (mitochondrial  
106 membrane potential and electron transport), and (3) organismal (total oxygen (O<sub>2</sub>) consumption).  
107 All three of these traits have been linked to mitochondrial performance in other taxa. In  
108 particular, mtDNA copy number is thought to affect mitochondrial function (Van den Bogert *et*  
109 *al.*, 1993; Taanman *et al.*, 1997; Moraes, 2001; Salminen *et al.*, 2017) and to be dynamically  
110 regulated in response to various cellular environmental cues (Hori *et al.*, 2009; Matsushima *et al.*,  
111 2010; Kelly *et al.*, 2012). This regulation is also thought to be tuned, at least in part, as a  
112 response to the energy demands of a cell (Moraes, 2001). Elevated mtDNA copy number has  
113 even been shown to compensate for deletions in mtDNA (Bai and Wong, 2005), but whether  
114 copy number elevation represents a general compensatory mechanism for mitochondrial  
115 mutation accumulation remains unclear (Montier *et al.*, 2009). Second, mitochondrial membrane  
116 potential, generated by electron transport, determines the strength of the electrochemical gradient  
117 mitochondria use to phosphorylate ADP to ATP (Nicholls, 2004). Variation in mitochondrial  
118 membrane potential has been linked to cellular aging (Nicholls, 2004) and longevity (Callegari *et*

119 *al.*, 2011). The JC-1 assay measures the strength of the electrochemical gradient in mitochondrial  
120 isolates using JC-1, a small positively charged molecule that fluoresces green when dispersed  
121 and red when aggregated under ultraviolet (UV) illumination (Garner and Thomas, 1999).  
122 Gradient strength can then be estimated from the ratio of red aggregate fluorescence to green  
123 fluorescence of the dye monomer. Third, electron flow through the electron transport chain  
124 (ETC) provides the energy necessary to establish a proton gradient (Brand and Murphy, 1987),  
125 such that increased electron flow should produce a corresponding increase in mitochondrial  
126 membrane potential. When isolated mitochondria are incubated with the compound MTT (3-  
127 (4,5-dimethylthiazol-2-yl) diphenyltetrazolium bromide), MTT accepts electrons from the ETC,  
128 forming a purple formazan product, the quantity of which positively correlates with electron flow  
129 (Liu *et al.*, 1997). Finally, because O<sub>2</sub> is the final electron acceptor for the production of ATP  
130 (Chance and Williams, 1955), total O<sub>2</sub> consumption represents an integrated measure of the ATP  
131 production capacity of an organism. Aquatic respirometry using a Clark-type electrode can  
132 detect changes in O<sub>2</sub> concentrations over time, allowing us to evaluate the rate at which whole  
133 organisms produce ATP. Because ectotherms respire at higher rates at elevated temperatures,  
134 heat stress can reveal inefficiencies in ATP production (Heise *et al.*, 2003; Abele *et al.*, 2007),  
135 allowing us to also use aquatic respirometry to compare ATP production in ambient *vs.* stress-  
136 inducing temperatures.

137         We adapted these well-established mitochondrial functional assays, to date employed  
138 exclusively in model organisms, to probe the number of mtDNA copies relative to the nuclear  
139 genome, estimate the strength of the electrochemical gradient, quantify the flow of electrons  
140 through the electron transport chain (ETC), and to quantify and compare total organismal O<sub>2</sub>  
141 consumption under heat stress across asexual *P. antipodarum* lineages. Together, these analyses

142 revealed substantial variation for mitochondrial function across distinct asexual lineages at all  
143 three levels of biological organization. More broadly, the assays adapted here provide a suite of  
144 useful experimental tools for investigating mitochondrial function in *P. antipodarum* and,  
145 potentially, other mollusks.

## 146 MATERIALS AND METHODS

### 147 Snail husbandry

148 We compared mitochondrial function across a diverse array of asexual *P. antipodarum* lineages  
149 (Neiman *et al.*, 2011; Paczesniak *et al.*, 2013; Table S1) reared under identical conditions for  
150 multiple generations. Asexual lineages were chosen for functional assays to represent the range  
151 of mitochondrial genetic diversity found in New Zealand populations (as demonstrated by  
152 Neiman and Lively, 2004; Neiman *et al.*, 2011; Paczesniak *et al.*, 2013) and to maximize our  
153 ability to compare across functional assays. Because there is notably high genetic diversity  
154 within asexual assemblages (Jokela *et al.*, 2003; Paczesniak *et al.*, 2013) and marked across-lake  
155 genetic structure (Neiman and Lively, 2004; Paczesniak *et al.*, 2013) in New Zealand *P.*  
156 *antipodarum*, and because nearly all of the lineages were from different lakes (Table S1), we can  
157 confidently interpret across-lineage variation in our various measures of mitochondrial function  
158 as representing genetic variation for these traits. Asexuality was established for each lineage by  
159 determining ploidy using flow cytometry (sexual *P. antipodarum* are diploid, asexuals are  
160 polyploid), as described in Neiman *et al.* (2011). We did not determine ploidy level for field-  
161 collected snails, which is why we did not use these individuals in lineage-level comparisons of  
162 mitochondrial performance. Adult female snails were selected arbitrarily from lineage  
163 populations or field collections for each assay. Following standard laboratory protocols for *P.*  
164 *antipodarum* (for example, Zachar and Neiman, 2013), snails were housed at 16°C on an 18 hr  
165 light/6 hr dark schedule and fed *Spirulina* algae 3x per week.

166

### 167 Mitochondrial function at the genomic level



168 To test whether asexual *P. antipodarum* exhibited across-lineage phenotypic variation for  
169 mitochondrial copy number, we used quantitative PCR (qPCR) to estimate mtDNA copy number  
170 relative to a putatively single-copy nuclear gene in six asexual triploid lineages. To identify a  
171 suitable nuclear-encoded gene to use as a control, we performed an all-by-all BLAST search of  
172 the transcriptomes available at <http://bioweb.biology.uiowa.edu/neiman/blastsearch.php> (Wilton  
173 *et al.*, 2013) to identify assembled transcripts that hit themselves and only themselves. We  
174 randomly selected 30 transcripts satisfying that criterion, designed primers, amplified sequences  
175 *via* PCR, and sequenced each transcript on an ABI 3730 DNA Analyzer (Applied Biosystems,  
176 Foster City, CA). Because *rad21* was the most consistent performer in PCR amplification  
177 experiments, we used our sequencing information to design new internal primers designed to  
178 produce a 264-bp product (F: 5'–GATTCCAACAACACTGATGTTTG–3', R: 5'–  
179 CAAAACCTTACTCTAAATCTGC–3') for use as a nuclear genome standard in qPCR  
180 experiments. We then designed primers to produce a 194-bp amplicon from *cytB* (F: 5'–  
181 TATGAATATTCAGATTTTTTAAATA–3', R: 5'– CCTTAACTCCTAATCTTGGTAC–3'),  
182 our mitochondrial standard. For measurement standards, each of these products was cloned from  
183 total DNA from a single *P. antipodarum* individual into the pGEM T-Easy plasmid vector  
184 (Promega Corp., Madison, WI). Linearized plasmids were diluted in the presence of carrier  
185 human genomic DNA to produce samples containing 300 – 300,000 copies of either the nuclear  
186 or mitochondrial amplicon. To evaluate mtDNA copy numbers, total DNA was isolated from  
187 three to five individual snails from each of the six lineages using a DNeasy Plant Mini Kit  
188 (Qiagen, Valencia, CA). We used this DNA to amplify nuclear and mitochondrial targets in  
189 triplicate in separate reactions on the same plate, together with serial dilutions of the cloned  
190 standards, using quantitative PCR on a StepOne Plus real-time thermal cycler (Applied

191 Biosystems, Foster City, CA). We converted quantitation cycle values ( $C_q$ , the PCR cycle at  
192 which amplification products accumulated above a defined threshold) from snail samples into  
193 copy numbers using standard curves generated from the cloned standards, as in Miller *et al.*  
194 (2003). We then used this information to determine the ratio of mitochondrial to haploid nuclear  
195 genome copies for each sample. Finally, we compared inferred mtDNA copy number across  
196 lineages using a one-way ANOVA and pairwise t-tests, ensuring that mtDNA copy numbers  
197 were normally distributed (Shapiro-Wilks  $W = 0.96$ ,  $p = 0.23$ ) and that variances between  
198 lineages were not significantly different (Levene's  $F = 0.63$ ,  $p = 0.68$ ). All statistical tests were  
199 performed in R v 3.2.4 (R Core Team, 2012), and all plots were produced using the *car* R  
200 package (Fox and Weisberg, 2011).

201

## 202 **Mitochondrial function at the organellar level**

203 Except where noted, all reagents were obtained from Sigma-Aldrich, St. Louis, MO.

### 204 *JC-1 assay*

205 To test for genetic variation in mitochondrial function in *P. antipodarum* in terms of  
206 mitochondrial membrane potential, we assayed mitochondrial membrane potentials using the JC-  
207 1 dye assay in 8-10 individual adult female snails from six distinct asexual lineages representing  
208 a diverse subset of the natural mitochondrial haplotype diversity found in New Zealand (Neiman  
209 *et al.*, 2011; Paczesniak *et al.*, 2013; Table S1). We used the uncoupler carbonyl cyanide m-  
210 chlorophenyl hydrazone (CCCP) to abolish the electrochemical gradient across the mitochondrial  
211 inner membrane in replicate subsamples, allowing us to control for background levels of  
212 fluorescence of JC-1 and of mitochondrial membranes unrelated to mitochondrial function.

213 For each snail, we first removed its shell and briefly washed the collected tissues by  
214 centrifugation at 600 x g in extraction buffer (10.0 mM HEPES [pH 7.5], 0.2 M mannitol, 70.0  
215 mM sucrose, 1.0 mM EGTA). We rapidly homogenized these tissues on ice in extraction buffer  
216 containing 2 mg/ml fatty acid-free bovine serum albumin (fafBSA) using a micropestle and then  
217 centrifuged the homogenate at 4°C for 5 minutes at 600 x g. The supernatant was recovered and  
218 held on ice separately while the pellet was re-homogenized and centrifuged again, as above. The  
219 pooled mitochondrial-enriched supernatant was centrifuged at 12,000 x g for 10 minutes and the  
220 pellet resuspended in buffer containing 10.0 mM HEPES (pH 7.5), 0.25 M sucrose, 1.0 mM ATP,  
221 0.08 mM ADP, 5.0 mM sodium succinate, 2.0 mM K<sub>2</sub>HPO<sub>4</sub>, and 1mM DTT. We divided each  
222 sample into three subsamples of 30 µl and added 500 µl assay buffer containing 20.0 mM MOPS  
223 (pH 7.5), 110.0 mM KCl, 10mM ATP, 10.0 mM MgCl<sub>2</sub>, 10.0 mM sodium succinate, and 1.0  
224 mM EGTA. The first subsample was incubated with buffer alone, to monitor background  
225 fluorescence, the second subsample was incubated with 2 µM JC-1 (Calbiochem, San Diego,  
226 CA), and the third with 2 µM JC-1 and 30 µM CCCP. All three subsamples were incubated in  
227 the dark at 37°C for 20 minutes, after which the ratio of red: green fluorescence was determined  
228 using flow cytometry (Becton Dickinson FacsCalibur, Franklin Lakes, NJ). Ungated data were  
229 collected from several hundred to several thousand mitochondrial particles per sample, on  
230 forward scatter (FSC) and side scatter (SSC), FL1 (green fluorescence, log scale), and FL2 (red  
231 fluorescence, log scale). We plotted FL1 vs. FL2 for each subsample after gating out debris in  
232 FlowJo v 10.0.8 (FlowJo, Ashland, OR), and derived the ratio of red to green for each particle.  
233 Unstained subsamples showed very low background autofluorescence that did not vary across  
234 lineages. Stained subsamples uncoupled by CCCP had low red:green ratios representative of  
235 dissipated charge gradients, while subsamples without uncoupler contained an additional fraction

236 of mitochondrial particles with higher ratios, representing coupled mitochondria. We used one-  
237 way ANOVA with lineage as a random factor to compare the median red: green ratio of particles  
238 in this final fraction across lineages following log transformation of red: green fluorescence  
239 ratios (Shapiro-Wilks  $W = 0.858$ ,  $p = 7.131 \times 10^{-6}$  prior to log transformation; Shapiro-Wilks  $W$   
240  $= 0.969$ ,  $p = 0.15$  following log transformation). Our ANOVA approach required a White  
241 adjustment (MacKinnon and White, 1985) because ratios of red: green fluorescence exhibited  
242 unequal variances across lineages, (Levene's  $F = 3.093$ ,  $p = 0.016$ ).

243

#### 244 *MTT assay*

245 We next tested whether there exists genetic variation for electron flux through the ETC in *P.*  
246 *antipodarum* by comparing MTT reduction across asexual lineages. We resuspended  
247 mitochondrial pellets pooled from 3-4 snails (obtained as described above) in 100  $\mu$ l buffer (125  
248 mM KCl, 2 mM  $K_2HPO_4$ , 1 mM  $MgCl_2$ , and 20 mM HEPES, adjusted to pH 7.4 with KOH)  
249 with 6 mM succinate as an energy substrate. We then added these resuspended mitochondria to  
250 wells in 96-well plates. The MTT reaction was initiated by adding 10  $\mu$ l of 2.5 mg/ml MTT to  
251 each well. We then incubated the plate for 2 hours at 37°C to allow electrons from the ETC to  
252 reduce MTT. Next, a 20% SDS 50% dimethylformamide solubilization solution was applied to  
253 each well and the plate was incubated overnight, after which the reduced formazan product was  
254 measured as  $A_{570}$  in a XL-800 microplate reader (Bio-Tek Instruments, Winooski, VT). We  
255 determined background absorbance from duplicate mitochondrial samples incubated without an  
256 energy substrate and subtracted this background value from all readings. Phosphate-buffered  
257 saline was used as a negative control and 0.1 mM dithiothreitol as a positive control for MTT  
258 reduction. A fraction of each original mitochondrial sample was lysed in SDS and then used in a

259 bicinchoninic acid assay (Smith *et al.*, 1985) to determine protein concentration. MTT reduction  
260 was expressed as  $A_{570}/\mu\text{g}$  protein. We performed a log transformation of the raw MTT values  
261 (Shapiro-Wilks  $W = 0.840$ ,  $p = 2.436 \times 10^{-5}$ ) to meet the assumptions of normality (Shapiro-  
262 Wilks  $W = 0.961$ ,  $p = 0.140$ ) and test for unequal variances (Levene's  $F = 0.964$ ,  $p = 0.452$ ). We  
263 then compared log-transformed MTT values using a one-way ANOVA with lineage as a random  
264 factor to test whether different asexual lineages exhibited different levels of electron flow  
265 through the ETC.

266

### 267 **Mitochondrial function at the organismal level**

268 To test for variation in  $\text{O}_2$  consumption in response to heat stress, we first needed to establish the  
269 range of heat stress likely to alter mitochondrial function in *P. antipodarum*. We accomplished  
270 this goal by using a behavioral assay that measures the amount of time that a snail takes to right  
271 itself when placed ventral side-up to compare righting ability in 13 asexual lineages ( $N = 10$   
272 individuals per lineage) across three temperature treatments (16°C, 22°C, 30°C). Righting ability  
273 is a commonly used method to gauge levels of snail stress (for example, Orr *et al.*, 2007). For  
274 example, snails exposed to hypoxic conditions exhibit increased righting time (and elevated  
275 HSP70 gene expression) compared to unexposed snails (Fei *et al.*, 2008). We began by  
276 incubating adult female *P. antipodarum* in carbon-filtered tap water (that is, the water in which  
277 the snails are housed) at the test temperature for 1 hour. Next, we placed snails ventral side-up in  
278 a petri dish and measured the number of seconds elapsed until the snail righted itself, up to 180  
279 seconds.

280         After determining that snails do appear to be stressed by elevated temperatures (see  
281 Results, Figure S1), we tested whether there exists genetic variation for  $\text{O}_2$  consumption under

282 heat stress by performing closed-system aquatic respirometry on seven asexual lineages of *P.*  
283 *antipodarum* (N = 10 per lineage) at the same three incubation temperatures used for the righting  
284 assay (16°C, 22°C, 30°C) with a Strathkelvin Instruments RC200a respiration chamber, a 892  
285 Oxygen Meter, and a 1302 Clark-type oxygen electrode (Strathkelvin Instruments, Motherwell,  
286 UK). We calibrated the electrode daily using the solubility of O<sub>2</sub> at each respective temperature  
287 (16°C – 309.0 μmol/liter, 22°C – 279.0 μmol/liter, 30°C – 236.0 μmol/liter). A high calibration  
288 point was obtained by stirring carbon-filtered water vigorously for 30 minutes prior to calibration,  
289 while we used a 2% sodium sulfite solution as a low calibration standard. We incubated each  
290 snail at the prescribed temperature for one hour prior to measurement, placed snails into the cell  
291 chamber, and obtained O<sub>2</sub> concentration readings for each snail every second for 1 hour. We  
292 maintained constant temperature in the respiration chamber by pumping temperature-controlled  
293 water into the cell chamber's water jacket. Upon completion of the 1-hour test period, we blotted  
294 each snail dry and measured its wet mass on a Denver Instruments Cubis Analytical Balance  
295 (Denver Instrument, Bohemia, NY). After correcting for snail wet mass, we then used a two-way  
296 ANOVA to address whether the fixed factor of temperature, the random factor of lineage, and  
297 the interaction between temperature and lineage affected the dependent variable of mass-  
298 corrected O<sub>2</sub> consumption.

299

### 300 **Comparison of mitochondrial functional assays**

301 Our mitochondrial function assays were aimed at different elements of mitochondrial  
302 performance and different levels of biological organization; whether and to what extent these  
303 assays are measuring related vs. orthogonal determinants of mitochondrial function remains  
304 unclear, especially as newly applied to *P. antipodarum*. We addressed this question by

305 performing all 15 possible pairwise comparisons of mitochondrial functional assays (that is,  
306 mtDNA copy number, mitochondrial membrane potential, electron flux, O<sub>2</sub> consumption at 16°C,  
307 O<sub>2</sub> consumption at 22°C, and O<sub>2</sub> consumption at 30°C), comparing the mean trait value per  
308 lineage across assays using Spearman’s rank correlation (as implemented by the *Hmisc* R  
309 package [Harrell, 2008]) and correcting for multiple comparisons using the Holm procedure  
310 (Holm 1979). For these analyses, we included two additional sample populations that were not  
311 used in any of the tests for across-lineage variation: one field-collected sample from a lake with a  
312 high frequency of sexual individuals (“KnSF12”) and an inbred diploid sexual lineage that has  
313 been maintained in the lab for >20 generations (“Y2”, Table S1).

## 314 **RESULTS**

### 315 **Mitochondrial function at the genomic level**

316 To test whether *P. antipodarum* exhibits heritable variation for mtDNA copy number, we  
317 compared qPCR amplification of the mitochondrially encoded *cytB* locus to amplification of a  
318 putatively single copy nuclear gene, *rad21*, in six asexual lineages of *P. antipodarum* reared in a  
319 common-garden setting (N = 3-8 per lineage). The mean (+/- SD) number of *cytb* copies to the  
320 number of *rad21* copies was 13.72 (+/- 3.57), though we also found significant differences in  
321 this ratio across asexual lineages (one-way ANOVA,  $F_{5, 25} = 2.72$ ,  $p = 0.043$ , Figure 1),  
322 indicating that lineages differ in mtDNA copy number. We performed pairwise t-tests of mtDNA  
323 copy number ratio among each pair of lineages, which revealed that a single lineage (Gr5; mean  
324 copy number ratio [+/- SD] = 9.42 [+/- 1.48]) with very low copy number appeared to be driving  
325 the significant among-lineage variance. This conclusion is supported by the fact that when Gr5 is  
326 excluded, other asexual lineages exhibit no differences in copy number (one-way ANOVA,  $F_{4, 21}$   
327 = 0.55,  $p = 0.70$ ).

328

### 329 **Mitochondrial function at the organellar level**

#### 330 *JC-1*

331 We compared membrane potential among mitochondria isolated from six asexual lineages of *P.*  
332 *antipodarum* using the JC-1 assay, in which the ratio of red to green fluorescence indicates the  
333 relative strength of the proton gradient. Our comparisons revealed significant differences in log-  
334 transformed ratios of red: green across asexual lineages (Welch's one-way ANOVA,  $F_{5, 52} =$   
335  $6.628$ ,  $p = 7.671 \times 10^{-5}$ , Figure 2a). We next performed *posthoc* pairwise comparisons between  
336 lineages using Welch's t-tests (to reflect unequal variances) and the Holm procedure for



337 Bonferroni correction (Holm 1979), which revealed three significantly different groups ( $p < 0.05$   
338 after correcting for multiple comparisons) amongst the six lineages (Figure 2a). Unlike mtDNA  
339 copy number, this variation in mitochondrial membrane potential does not appear to be driven by  
340 a single lineage. Because CCCP-uncoupled samples did not vary across lineages (one-way  
341 ANOVA,  $F_{5,52} = 1.37$ ,  $p = 0.25$ ), the variation observed for red: green fluorescence across  
342 lineages likely reflects true variation in mitochondrial membrane potential. In particular, these  
343 data suggest that under the current rearing and assay conditions, the Gr5 lineage appears to have  
344 the strongest mitochondrial membrane potential (mean [ $\pm$  SD] = 3.86 [ $\pm$  1.55]) and the DenA  
345 lineage (mean [ $\pm$  SD] = 1.78 [ $\pm$  0.47]) appears to have the weakest mitochondrial membrane  
346 potential.

347

348 *MTT*

349 We next compared electron flux through the ETC using the colorimetry-based MTT assay. We  
350 did not detect any differences amongst asexual lineages in MTT reduction (one-way ANOVA,  $F_{5,38}$   
351  $= 0.75$ ,  $p = 0.59$ , Figure 2b) despite relatively high statistical power for this comparison ( $= 0.92$ ,  
352 as estimated by the *pwr* package in R [Champely, 2012]). This result therefore indicates that *P.*  
353 *antipodarum* lacks substantial genetic variation for electron flux through the ETC, at least under  
354 the benign environmental conditions in which we performed this assay.

355

### 356 **Mitochondrial function at the organismal level**

357 Organismal O<sub>2</sub> consumption under stressful conditions is expected to reflect electron acceptor  
358 turnover under maximal ATP production (Abele *et al.*, 2007), which is the logical basis for our  
359 application of heat stress to detect genetic variation in O<sub>2</sub> consumption. We began by comparing

360 righting time across ambient (16°C) and elevated (22°C, 30°C) temperatures and lineages with a  
361 Kruskal-Wallis test, and found that both factors significantly affected righting time (temperature:  
362  $\chi^2 = 14.218$ ,  $df = 2$ ,  $p = 0.00082$ ; lineage:  $\chi^2 = 122.64$ ,  $df = 12$ ,  $p < 2.2 \times 10^{-16}$ ). *Post-hoc* Mann-  
363 Whitney U tests revealed that righting took ~ 37% longer at 30°C (mean [+/- SD] = 83.02 [+/-  
364 73.74] seconds) than at 16°C (Mann-Whitney U = 8192,  $p = 0.025$ ) and ~85% longer at 30°C  
365 than at 22°C (Mann-Whitney,  $U = 5996.5$ ,  $p = 0.00014$ , Figure S1). While righting time was  
366 ~24% faster at 22°C (mean [+/- SD] = 48.82 [+/- 56.09] seconds) than at 16°C (mean [+/- SD] =  
367 62.50 [+/- 63.26] seconds), this difference was not significant (Mann-Whitney,  $U = 9244.5$ ,  $p =$   
368 0.075). These results are consistent with other righting time assays from other snail species in  
369 that some amount of stress decreases righting time (for example, presence of predators, Orr *et al.*,  
370 2007), and some stimuli increase righting time (for example, hypoxia, Fei *et al.*, 2008),  
371 suggesting that our observed responses indicate stress in *P. antipodarum* exposed to elevated  
372 temperature (here, 30°C).

373 To test for genetic variation in O<sub>2</sub> consumption in heat-stressed *P. antipodarum*, we  
374 performed closed-system aquatic respirometry for seven asexual lineages (N = 10 per lineage) at  
375 16°C, 22°C, and 30°C. Snail wet mass was significantly and positively correlated with O<sub>2</sub>  
376 consumption (Spearman's rho = 0.19,  $p = 0.0086$ , Figure S2). Because there is significant  
377 variation for snail wet mass across asexual lineages (Kruskal-Wallis,  $\chi^2 = 75.09$ ,  $df = 6$ ,  $p <$   
378 0.00010), we calculated the residuals of wet mass vs. O<sub>2</sub> consumption using a linear model. Cube  
379 root-transformed, mass-corrected O<sub>2</sub> consumption residuals were not significantly different from  
380 a normal distribution (Shapiro-Wilks  $W = 0.99$ ,  $p = 0.060$ ), allowing us to implement a linear  
381 regression model to test whether temperature and/or lineage affected O<sub>2</sub> consumption. We found  
382 that elevated temperatures significantly affected mass-corrected O<sub>2</sub> consumption (two-way

383 ANOVA,  $F_{2, 175} = 46.22$ ,  $p = 2.2 \times 10^{-16}$ ) and that there was a significant interaction between  
384 lineage and temperature (Figure 3, two-way ANOVA,  $F_{6, 175} = 3.40$ ,  $p = 1.7 \times 10^{-4}$ ). We also  
385 found a trend towards an effect of lineage on mass-corrected O<sub>2</sub> consumption (two-way ANOVA,  
386  $F_{6, 175} = 2.12$ ,  $p = 0.053$ ). A series of one-way ANOVAs within each temperature treatment  
387 revealed that lineage had a significant effect on O<sub>2</sub> consumption at 22°C (one-way ANOVA,  $F_{6, 54} = 2.83$ ,  $p = 0.018$ ) and at 30°C (one-way ANOVA,  $F_{6, 62} = 3.85$ ,  $p = 0.0025$ ), but not at 16°C  
388 (one-way ANOVA,  $F_{6, 59} = 2.10$ ,  $p = 0.067$ ). In particular, lineages responded differently to  
389 elevated temperature, with some lineages (for example, Ta10) exhibiting relatively high O<sub>2</sub>  
390 consumption at high temperatures and others maintaining similar levels of O<sub>2</sub> consumption (for  
391 example, Gn5) across temperatures (Figure 3). This result demonstrates that genetically distinct  
392 lineages of *P. antipodarum* consume different amounts of O<sub>2</sub> in response to elevated temperature  
393 (22°C) and heat stress (30°C).

395

### 396 **Comparison of mitochondrial functional assays**

397 To determine whether and to what extent our different measures of mitochondrial function are  
398 associated, we performed Spearman's rank correlation for each of the 15 possible pairwise  
399 comparisons of the assays for mtDNA copy number, log-transformed JC-1 red: green ratios, log-  
400 transformed MTT values, and cube root-transformed, mass-corrected O<sub>2</sub> consumption residuals  
401 at each of our three study temperatures. None of the correlations remained significant after the  
402 Holm correction for multiple comparisons (Figure 4). The absence of significant relationships  
403 between assay results is not surprising in light of the fact that we had power of ~ 0.35 – 0.65 to  
404 detect a relationship between two variables at the  $p < 0.003$  level, the alpha required by the Holm  
405 procedure. Power notwithstanding, there were some interesting potential trends that deserve

406 further scrutiny. First, mtDNA copy number appears to be positively correlated with O<sub>2</sub>  
407 consumption at 30°C among the six asexual lineages assayed (Spearman's rho = 0.94,  $p = 0.0048$ ,  
408 Figure 4e). Second, while the MTT assay required pooling of mitochondria from 3-4 individual  
409 snails per measurement and is thus somewhat less sensitive than the JC-1 assay, which only  
410 requires mitochondria from one snail, we did find a trend towards a positive correlation between  
411 electron flux and mitochondrial membrane potential in the six asexual and two sexual *P.*  
412 *antipodarum* lineages examined (Spearman's rho = 0.81,  $p = 0.015$ , Figure 4f). Third, there  
413 electron flux appeared to be negatively correlated with O<sub>2</sub> consumption at 22°C for the six  
414 asexual lineages (Spearman's rho = -0.89,  $p = 0.019$ , Figure 4k). These tentative relationships  
415 between mtDNA, electron flux through the ETC, mitochondrial membrane potential, and  
416 organismal O<sub>2</sub> consumption suggest that 1) the methods we employed here assay distinct yet  
417 associated mitochondrial phenotypes, and 2), evaluating mitochondrial performance at multiple  
418 levels of biological organization is necessary to describe adequately the phenotypic variation for  
419 mitochondrial function in *P. antipodarum*.

## 420 **DISCUSSION**

### 421 **Genetic variation for mitochondrial function in asexual lineages**

422 We used obligately asexual lineages of *Potamopyrgus antipodarum*, a freshwater New Zealand  
423 snail, to test for genetic variation in mitochondrial function in a common-garden setting. We  
424 found significant levels of variation at all three levels of biological organization that we assayed,  
425 1) mtDNA copy number, 2) mitochondrial membrane potential, and 3) variation in O<sub>2</sub>  
426 consumption in response to heat stress. These results demonstrate that substantial variation for  
427 mitochondrial function exists across asexual lineages of this species.

428 While the extent to which the variation in mitochondrial function described here  
429 contributes to fitness in *P. antipodarum* remains to be directly evaluated, the close link between  
430 mitochondrial function and fitness in other organisms (Chen *et al.*, 2007; Dowling, 2014)  
431 suggests that phenotypic variation across mitonuclear genotypes could have major implications  
432 for asexual lineage success. In particular, asexual *P. antipodarum* are known to harbor high  
433 mtDNA mutational loads relative to sexual lineages (Neiman *et al.*, 2010; Sharbrough *et al.*,  
434 2016), and heat stress response can affect fecundity (Dybdahl and Kane, 2005) and respiration  
435 rates (Hudson, 1983, present study) in *P. antipodarum*. These findings suggest that variation in  
436 mitochondrial function might very well confer fitness consequences, especially amongst asexual  
437 lineages that are experiencing stressful conditions.

438 The substantial across-lineage variation that we discovered provides functional evidence  
439 of high levels of asexual phenotypic diversity in *P. antipodarum*, consistent with previous  
440 reports that asexual *P. antipodarum* harbor substantial genetic (Jokela *et al.*, 2003; Paczesniak *et*  
441 *al.*, 2013) and phenotypic (Neiman *et al.*, 2009, 2013; Kistner and Dybdahl, 2013) diversity. The  
442 multiple separate transitions to asexuality in *P. antipodarum* (Neiman *et al.*, 2011; Paczesniak *et*

443 *al.*, 2013) may help explain the substantial levels of variation found here, as asexual lineages  
444 represent “snapshots” of local sexual population diversity (Dybdahl and Lively, 1995; Jokela *et*  
445 *al.*, 1997).

446         The mitochondrial phenotypes we observed in one lineage, Gr5, were particularly  
447 distinct: snails from this lineage exhibited relatively low mitochondrial copy number and high  
448 mitochondrial membrane potential and electron flow, as well as relatively low O<sub>2</sub> consumption at  
449 22°C. Together, these phenotypic values suggest that the Gr5 lineage exhibits relatively high  
450 mitochondrial function, indicating that genetic dissection of its mitochondrial haplotype may  
451 prove illuminating. Further comparisons with other *P. antipodarum* lineages and in other  
452 conditions will provide substantial insight into the relative fitness of this particular mitonuclear  
453 combination. Future studies should also focus on a particular mitochondrial haplotype that  
454 appears to be especially common amongst asexual *P. antipodarum* (Neiman *et al.*, 2011;  
455 Paczesniak *et al.*, 2013). Paczesniak *et al.* (2013) showed that this haplotype is often found in  
456 divergent nuclear backgrounds, consistent with a scenario in which this haplotype is spreading  
457 into new populations and lineages. Evaluating mitochondrial function of the common  
458 mitochondrial haplotype against a variety of nuclear backgrounds and in various biologically  
459 relevant conditions would shed light on intraspecific mitonuclear coevolution and whether  
460 asexuality contributes to decreased mitochondrial function in *P. antipodarum*, as the mutational  
461 hypotheses for sex would predict.

462

### 463 **Relationships among mitochondrial functional assays**

464 All else being equal, stronger mitochondrial membrane potentials and greater electron flow  
465 should indicate relatively high mitochondrial performance. The relationships between whole-

466 organismal O<sub>2</sub> consumption and mitochondrial performance or between mtDNA copy number  
467 and mitochondrial performance are expected to be more complex and to reflect compensatory  
468 mechanisms at the cellular and/or organismal level. Because other factors (for example,  
469 environmental conditions, local adaptation) are virtually certain to influence mitochondrial  
470 function, it is also possible that high mitochondrial performance in common-garden conditions  
471 does not reflect mitochondrial performance in nature. Despite this caveat, the tools developed  
472 here will provide an important starting point with which to interrogate mitochondrial function in  
473 non-model systems.

474         Although the number of asexual lineages included in the present study was relatively  
475 small, we did observe some interesting tentative relationships between mtDNA copy number,  
476 electron flux through the ETC, mitochondrial membrane potential, and organismal O<sub>2</sub>  
477 consumption (Figure 4). The observation that lineages with high mtDNA copy numbers consume  
478 more O<sub>2</sub> at elevated temperatures than lineages with lower mtDNA copy numbers may reflect  
479 saturation of OXPHOS pathways during heat stress in lineages with low mtDNA copy numbers.  
480 Compensation for reduced mitochondrial function by increasing mtDNA copy number has been  
481 observed in human tissues carrying a variety of small deletion mutations (Bai and Wong, 2005),  
482 although the relationship between mtDNA copy number and respiratory capacity remains  
483 complex (Moraes, 2001; Montier *et al.*, 2009). The positive relationship between electron flux  
484 and mitochondrial membrane potential is not particularly surprising in light of the fact that as  
485 electrons pass through the ETC, a corresponding increase in mitochondrial membrane potential  
486 is expected as H<sup>+</sup> ions are released into the intermembrane space (Chen, 1988). The association  
487 between relatively low electron flux and high O<sub>2</sub> consumption is more difficult to understand  
488 because O<sub>2</sub> consumption is expected to increase with electron flux (Jastroch *et al.*, 2010). In

489 general, relationships between organismal-level O<sub>2</sub> consumption and organelle-level electron  
490 flux are difficult to disentangle because many layers of respiratory regulation can contribute to  
491 increased organismal O<sub>2</sub> consumption beyond ETC inefficiencies (Brand and Nicholls, 2011). A  
492 particularly relevant example is provided by combined observations that electrons leaking back  
493 across the inner membrane through uncoupling proteins contribute to electron flux but not O<sub>2</sub>  
494 consumption (reviewed in Jastroch *et al.*, 2010) and that elevated temperatures in a marine  
495 mollusk have been shown to increase electron leakage of this type (Abele *et al.*, 2002), such that  
496 connecting organismal O<sub>2</sub> consumption to organellar electron flux is a non-trivial exercise.  
497 Understanding the relationship between organellar and organismal variation in mitochondrial  
498 function will provide helpful context for interpreting functional variation in *P. antipodarum*, and  
499 future efforts towards examining these relationships in more detail are necessary. More broadly,  
500 the methods described here can be easily adapted to other non-model organisms, especially  
501 mollusks, providing a new means of quantifying the genotype-phenotype relationships of  
502 mitonuclear interactions.



503 **DATA ARCHIVING**

504 All data will be made available on Dryad upon acceptance.

505

506 **CONFLICT OF INTEREST**

507 The authors declare no conflict of interest for the work described here.

508

509 **FUNDING**

510 This work was supported by the National Science Foundation (NSF: MCB – 1122176; DEB –

511 1310825) and the Iowa Academy of Sciences (ISF #13-10).

512

513 **ACKNOWLEDGEMENTS**

514 We thank JD Woodell for assistance with aquatic respirometry and Claire Tucci, Meagan Luse,

515 and Nikhil Puttagunta for their help measuring snail righting behavior. We acknowledge several

516 anonymous reviewers for helpful comments on previous iterations of this manuscript.

517 **TITLES AND LEGENDS TO FIGURES**

518 **Figure 1. mtDNA copy number variation in six asexual lineages of *P. antipodarum*.** Box-  
519 and-whisker plot depicting qPCR estimates (rank ordered by median) of *cytB* copy number  
520 relative to a putatively single-copy nuclear gene, *rad21*. Boxes represent Inner Quartile Ranges  
521 (IQR), with error bars extending 1.5x beyond IQRs. Data points falling outside whiskers are  
522 denoted by open circles. Shared lowercase letters indicate  $p > 0.05$  for pairwise t-tests corrected  
523 for multiple comparisons using the Holm procedure for multiple comparisons. N = 10  
524 individuals for all lineages.

525

526 **Figure 2. Organellar function of mitochondrial fractions isolated from six lineages of *P.***  
527 ***antipodarum*.** a) Estimate of mitochondrial membrane potential using the ratio of red to green  
528 JC-1 dye fluorescence from individual snails (N = 10 individuals for all lineages). Lineages were  
529 rank ordered by median with boxes representing IQRs; error bars extend 1.5x beyond IQRs. Data  
530 points falling outside error bars are denoted by open circles. Shared lowercase letters indicate  $p >$   
531 0.05 for pairwise Welch's T-tests, corrected using the Holm procedure for multiple comparisons.  
532 b) Estimate of electron flux through OXPHOS pathway using the colorimetric MTT reduction  
533 assay from pooled mitochondrial extractions (3 snails pooled per replicate, 3 – 6 replicates per  
534 lineage). Lineages were rank ordered by median value with boxes representing IQRs and error  
535 bars extending 1.5x beyond IQRs. Data points falling outside error bars are denoted by open  
536 circles. Lineages did not appear to differ in MTT reduction.

537

538 **Figure 3. Interaction plot depicting relationship between O<sub>2</sub> consumption residuals,**  
539 **temperature, and snail lineage.** Lines indicate best-fit linear regression of O<sub>2</sub> consumption

540 across temperature pairs (for example, 16°C – 22°C) for seven asexual lineages of *P.*  
541 *antipodarum*. O<sub>2</sub> consumption was measured for 10 individual snails at each temperature for  
542 each lineage.  
543  
544 **Figure 4. Comparisons of mitochondrial functional assays.** Spearman's rank correlations for  
545 all pairwise comparisons of mitochondrial functional assays. Best-fit linear regression lines  
546 (black) are only shown for those comparisons that were significant at the  $p < 0.05$  level. a)  
547 mtDNA copy number vs. JC-1 (Spearman's rho = -0.1,  $p = 0.82$ ). b) mtDNA copy number vs.  
548 MTT reduction (Spearman's rho = -0.33,  $p = 0.42$ ). c) mtDNA copy number vs. O<sub>2</sub> consumption  
549 at 16°C (Spearman's rho = -0.14,  $p = 0.76$ ). d) mtDNA copy number vs. O<sub>2</sub> consumption at 22°C  
550 (Spearman's rho = 0.2,  $p = 0.70$ ). e) mtDNA copy number vs. O<sub>2</sub> consumption at 30°C  
551 (Spearman's rho = 0.94,  $p = 0.0048$ ). f) JC-1 vs. MTT reduction (Spearman's rho = 0.81,  $p =$   
552 0.015). g) JC-1 vs. O<sub>2</sub> consumption at 16°C (Spearman's rho = 0.0,  $p = 1.0$ ). h) JC-1 vs. O<sub>2</sub>  
553 consumption at 22°C (Spearman's rho = -0.71,  $p = 0.11$ ). i) JC-1 assay vs. O<sub>2</sub> consumption at  
554 30°C (Spearman's rho = -0.09,  $p = 0.87$ ). j) MTT reduction vs. O<sub>2</sub> consumption at 16°C  
555 (Spearman's rho = 0.5,  $p = 0.25$ ). k) MTT reduction vs. O<sub>2</sub> consumption at 22°C (Spearman's rho  
556 = -0.89,  $p = 0.019$ ). l) MTT reduction vs. O<sub>2</sub> consumption at 30°C (Spearman's rho = -0.43,  $p =$   
557 0.40). m) O<sub>2</sub> consumption at 16°C vs. O<sub>2</sub> consumption at 22°C (Spearman's rho = -0.39,  $p = 0.38$ ).  
558 n) O<sub>2</sub> consumption at 16°C vs. O<sub>2</sub> consumption at 30°C (Spearman's rho = -0.14,  $p = 0.76$ ). o) O<sub>2</sub>  
559 consumption at 22°C vs. O<sub>2</sub> consumption at 30°C (Spearman's rho = 0.32,  $p = 0.48$ ).

560 **SUPPLEMENTARY MATERIAL TITLES TO FIGURES AND LEGENDS**

561

562 **Figure S1. Interaction plot depicting relationship between temperature, lineage, and**  
563 **righting time in *P. antipodarum*.** Lines represent best-fit lines between righting times for a  
564 given lineage across 16°C – 22°C and 22°C – 30°C. Red lines represent asexual lineages; blue  
565 lines represent sexual lineages; black lines represent "mixed" field-collected populations. Snails  
566 righted themselves significantly more slowly at 30°C than 16°C (Mann-Whitney  $U = 8192$ ,  $p =$   
567  $0.025$ ) and 22°C (Mann-Whitney,  $U = 5996.5$ ,  $p = 0.00014$ ), indicating that 30°C water  
568 temperatures represent a significant source of heat stress.

569

570 **Figure S2. Relationship between snail wet mass and oxygen consumption in *P. antipodarum*.**

571 There was a significant positive correlation between snail wet mass and O<sub>2</sub> consumption  
572 (Spearman's  $\rho = 0.19$ ,  $p = 0.0086$ ).

573

574 **REFERENCES**

- 575 Abele D, Heise K, Portner HO, Puntarulo S (2002). Temperature-dependence of mitochondrial  
576 function and production of reactive oxygen species in the intertidal mud clam *Mya*  
577 *arenaria*. *J Exp Biol* **205**: 1831-1841.
- 578 Abele D, Philipp E, Gonzalez P, Puntarulo S (2007). Marine invertebrate mitochondria and  
579 oxidative stress. *Front Biosci* **12**: 933-946.
- 580 Bai RK, Wong LJC (2005). Simultaneous detection and quantification of mitochondrial DNA  
581 deletion(s), depletion, and over-replication in patients with mitochondrial disease. *J Mol*  
582 *Diagn* **7**: 613–622.
- 583 Barr CM, Neiman M, Taylor DR (2005). Inheritance and recombination of mitochondrial  
584 genomes in plants, fungi and animals. *New Phytol* **168**: 39-50.
- 585 Brand MD, Murphy MP (1987). Control of electron flux through the respiratory chain in  
586 mitochondria and cells. *Biol Rev* **62**: 141-193.
- 587 Brand, MD, Nicholls DG (2011). Assessing mitochondrial dysfunction in cells. *Biochem J* **435**:  
588 297-312.
- 589 Callegari S, McKinnon RA, Andrews S, de Barros Lopes MA (2011). The MEF2 gene is  
590 essential for yeast longevity, with a dual role in cell respiration and maintenance of  
591 mitochondrial membrane potential. *FEBS Lett* **585**: 1140-1146.
- 592 Champely S (2012). pwr: Basic functions for power analysis. *R package version 1*.
- 593 Chance B, Williams GR (1955). Respiratory enzymes in oxidative phosphorylation. I. Kinetics  
594 of oxygen utilization. *J Biol Chem* **217**: 383-393.
- 595 Chen, LB (1988). Mitochondrial membrane potential in living cells. *Ann Rev Cell Biol* **4**: 155-  
596 181.

- 597 Chen JH, Hales CN, Ozanne SE (2007). DNA damage, cellular senescence and organismal  
598 ageing: causal or correlative? *Nucl Acids Res* **35**: 7417-7428.
- 599 DiMauro S, Schon EA (2001). Mitochondrial DNA mutations in human disease. *Am J Med*  
600 *Genet* **106**: 18-26.
- 601 Dowling DK, Abiega KC, Arnqvist G (2007). Temperature-specific outcomes of cytoplasmic  
602 nuclear interactions on egg-to-adult development time in seed beetles. *Evolution* **61**:  
603 194-201.
- 604 Dowling DK (2014). Evolutionary perspectives on the links between mitochondrial genotype and  
605 disease phenotype. *Biochim Biophys Acta* **1840**: 1393-1403.
- 606 Dybdahl MF, Lively CM (1995). Diverse, endemic and polyphyletic clones in mixed populations  
607 of a freshwater snail. *J Evol Biol* **8**: 385-398.
- 608 Dybdahl MF, Kane SL (2005). Adaptation vs. phenotypic plasticity in the success of a  
609 clonal invader. *Ecology* **86**: 1592-1601.
- 610 Ellison CK, Burton RS (2006). Disruption of mitochondrial function in interpopulation hybrids  
611 of *Tigriopus californicus*. *Evolution* **60**: 1382-1391.
- 612 Fei G, Guo C, Sun HS, Feng ZP (2008). HSP70 reduces chronic hypoxia-induced neural  
613 suppression via regulating expression of syntaxin. In: Poulin MJ, Wilson RJA (eds)  
614 *Integration in Respiratory Control*, Springer: New York, pp. 35-40.
- 615 Fox J, Weisberg S (2011). An R companion to applied regression, 2nd Edition. Thousand Oaks,  
616 CA: Sage. URL: <http://socserv.socsci.mcmaster.ca/jfox/Books/Companion>
- 617 Garner DL, Thomas CA (1999). Organelle-specific probe JC-1 identifies membrane potential  
618 differences in the mitochondrial function of bovine sperm. *Mol Repro Dev* **53**: 222-229.
- 619 Harrell Jr FE (2008). Hmisc: harrell miscellaneous. *R package version 3*.

- 620 Heise K, Puntarulo S, Portner HO, Abele D (2003). Production of reactive oxygen species by  
621 isolated mitochondria of the Antarctic bivalve *Laternula elliptica* (King and Broderip)  
622 under heat stress. *Comp Biochem Physiol C Toxicol Pharmacol* **134**: 79-90.
- 623 Holm S (1979). A simple sequentially rejective multiple test procedure. *Scand J Statist* **1**: 65-70.
- 624 Hori A, Yoshida M, Shibata T, Ling F (2009). Reactive oxygen species regulate DNA copy  
625 number in isolated yeast mitochondria by triggering recombination-mediated replication.  
626 *Nucl Acids Res* **37**: 749-761.
- 627 Hudson JAL (1983). Oxygen consumption of the mollusc *Potamopyrgus antipodarum*  
628 in relation to habitat. Ph.D. Thesis. University of Canterbury.
- 629 Jastroch M, Divakaruni AS, Mookerjee S, Treberg JR, Brand MD (2010). Mitochondrial proton  
630 and electron leaks. *Ess Biochem* **47**: 53-67.
- 631 Jokela J, Lively CM, Fox JA, Dybdahl MF (1997) Flat reaction norms and "frozen" phenotypic  
632 variation in clonal snails (*Potamopyrgus antipodarum*). *Evolution* **51**: 1120-1129.
- 633 Jokela J, Lively CM, Dybdahl MF, Fox JA (2003). Genetic variation in sexual and clonal  
634 lineages of a freshwater snail. *Biol J Linn Soc* **79**: 165-181.
- 635 Kelly RD, Mahmud A, McKenzie M, Trounce IA, St John JC (2012). Mitochondrial DNA copy  
636 number is regulated in a tissue specific manner by DNA methylation of the nuclear-  
637 encoded DNA polymerase gamma A. *Nucl Acids Res* **40**: 10124-10138.
- 638 Kistner EJ, Dybdahl MF (2013). Adaptive responses and invasion: the role of plasticity and  
639 evolution in snail shell morphology. *Ecol Evol* **3**: 424-436.
- 640

- 641 Latorre-Pellicer A, Moreno-Loshuertos R, Lechuga-Vieco AV, Sánchez-Cabo F, Torroja,  
642 C, Acín-Pérez R, Calvo E, Aix E, González-Guerra A, Logan A, Bernad-Miana ML,  
643 Romanos E, Cruz R, Cogliati S, Sobrino B, Carracedo Á, Pérez-Martos A, Fernández-  
644 Silva P, Ruíz-Cabello J, Murphy MP, Flores I, Vázquez J, Enríquez JA (2016).  
645 Mitochondrial and nuclear DNA matching shapes metabolism and healthy ageing. *Nature*  
646 **535**: 561-565.
- 647 Lee-Yaw JA, Jacobs CG, Irwin DE (2014). Individual performance in relation to cytonuclear  
648 discordance in a northern contact zone between long-toed salamander (*Ambystoma*  
649 *macrodactylum*) lineages. *Mol Ecol* **23**: 4590-4602.
- 650 Liu Y, Peterson DA, Kimura H, Schubert D (1997). Mechanism of cellular 3-(4,5-  
651 dimethylthiazo-2-yl)-2,5-diphenyltetrazolium bromide (MTT) reduction. *J Neurochem*  
652 **69**: 581-593.
- 653 Lively CM (1987). Evidence from a New Zealand snail for the maintenance of sex by parasitism.  
654 *Nature* **328**: 519-521.
- 655 MacKinnon JG, White H (1985). Some heteroskedasticity-consistent covariance matrix  
656 estimators with improved finite sample properties. *J Econometr* **29**: 305-325.
- 657 Matsushima Y, Goto Y, Kaguni LS (2010). Mitochondrial Lon protease regulates mitochondrial  
658 DNA copy number and transcription by selective degradation of mitochondrial  
659 transcription factor A (TFAM). *Proc Natl Acad Sci USA* **107**: 18410-18415.
- 660 Meiklejohn CD, Holmbeck MA, Siddiq MA, Abt DN, Rand DM, Montooth KL (2013). An  
661 incompatibility between a mitochondrial tRNA and its nuclear-encoded tRNA synthetase  
662 compromises development and fitness in *Drosophila*. *PLoS Genet* **9**: e1003238.
- 663



- 664 Montier LLC, Deng JJ, Bai Y (2009). Number matters: control of mammalian mitochondrial  
665 DNA copy number. *J Genet Genom* **36**: 125-131.
- 666 Montooth, KL, Meiklejohn CD, Abt DN, Rand DM (2010). Mitochondrial–nuclear epistasis  
667 affects fitness within species but does not contribute to fixed incompatibilities between  
668 species of *Drosophila*. *Evolution*, **64**: 3364-3379.
- 669 Moraes CT (2001). What regulates mitochondrial DNA copy number in animal cells? *Trends*  
670 *Genet* **17**: 199-205.
- 671 Neiman M, Lively CM (2004). Pleistocene glaciation is implicated in the phylogeographical  
672 structure of *Potamopyrgus antipodarum*, a New Zealand snail. *Mol Ecol* **13**: 3085-3098.
- 673 Neiman M, Linksvayer TA. (2006). The conversion of variance and the evolutionary potential of  
674 restricted recombination. *Heredity* **96**: 111-121.
- 675 Neiman M, Taylor DR (2009). The causes of mutation accumulation in mitochondrial genomes.  
676 *Proc Roy Soc Lond B* **276**: 1201-1209.
- 677 Neiman M, Theisen K, Mayry ME, Kay AD (2009). Can phosphorus limitation contribute to the  
678 maintenance of sex? A test of a key assumption. *J Evol Biol* **22**:1359-1363.
- 679 Neiman M, Hehman G, Miller JT, Logsdon Jr JM, Taylor DR (2010). Accelerated mutation  
680 accumulation in asexual lineages of a freshwater snail. *Mol Biol Evol* **27**: 954-963.
- 681 Neiman M, Paczesniak D, Soper DM, Baldwin AT, Hehman G (2011). Wide variation in ploidy  
682 level and genome size in a New Zealand freshwater snail with coexisting sexual and  
683 asexual lineages. *Evolution* **65**: 3202-3216.
- 684 Neiman M, Kay AD, Krist AM (2013). Sensitivity to phosphorus limitation increases with ploidy  
685 level in a New Zealand snail. *Evolution* **67**: 1511-1517.
- 686 Nicholls DG (2004). Mitochondrial membrane potential and aging. *Aging Cell* **3**: 35-40.

- 687 Orr MV, El-Bekai M, Lui M, Watson K, Lukowiak K (2007). Predator detection in *Lymnaea*  
688 *stagnalis*. *J Exp Biol* **210**: 4150-4158.
- 689 Paczesniak D, Jokela J, Larkin K, Neiman M (2013). Discordance between nuclear and  
690 mitochondrial genomes in sexual and asexual lineages of the freshwater snail *Potamopyrgus*  
691 *antipodarum*. *Mol Ecol* **22**: 4695-4710.
- 692 Phillips NR, Lambert DM (1989). Genetics of *Potamopyrgus antipodarum* (Gastropoda:  
693 Prosobranchia): evidence for reproductive modes. *NZ J Zool* **16**: 435-445.
- 694 Pichaud N, Ballard JW, Tanguay RM, Blier PU (2013). Mitochondrial haplotype divergences  
695 affect specific temperature sensitivity of mitochondrial respiration. *J Bioenerget*  
696 *Biomembr* **45**: 25-35.
- 697 R Core Team (2012). R: A language and environment for statistical computing. R Foundation for  
698 Statistical Computing, Vienna, Austria. URL <https://www.R-project.org/>.
- 699 Rand DM, Haney RA, Fry AJ (2004). Cytonuclear coevolution: the genomics of cooperation.  
700 *Trends Ecol Evol* **19**: 645-653.
- 701 Rawson PD, Burton RS (2002). Functional coadaptation between cytochrome c and cytochrome  
702 c oxidase within allopatric populations of a marine copepod. *Proc Natl Acad Sci USA* **99**:  
703 12955-12958.
- 704 Salminen TS, Oliveira MT, Cannino G, Lillsunde P, Jacobs HT, Kaguni LS (2017).  
705 Mitochondrial genotype modulates mtDNA copy number and organismal phenotype in  
706 *Drosophila*. *Mitochondrion* **doi**: <http://dx.doi.org/10.1016/j.mito.2017.02.001>
- 707 Sharbrough J, Luse M, Boore JL, Logsdon Jr JM, Neiman M (2016). Radical changes persist  
708 longer in the absence of sex. *bioRxiv* **doi**: <http://dx.doi.org/10.1101/049924>.  
709

- 710 Sloan DB, Triant DA, Wu M, Taylor DR (2014). Cytonuclear interactions and relaxed selection  
711 accelerate sequence evolution in organelle ribosomes. *Mol Biol Evol* **31**: 673-682.
- 712 Smith PK, Krohn RI, Hermanson GT, Mallia AK, Gartner FH, Provenzano MD, *et al.* (1985).  
713 Measurement of protein using bicinchoninic acid. *Anal Biochem* **150**: 76–85.
- 714 Taanman, JW, Bodnar AG, Cooper JM, Morris AAM, Clayton PT, Leonard JV, Schapira AHV  
715 (1997). Molecular mechanisms in mitochondrial DNA depletion syndrome. *H Mol Genet*  
716 **6**: 935-942.
- 717 Van den Bogert C, De Vries H, Holtrop M, Muus P, Dekker HL, Van Galen MJ, *et al* (1993).  
718 Regulation of the expression of mitochondrial proteins: relationship between mtDNA  
719 copy number and cytochrome-c oxidase activity in human cells and tissues. *Biochim*  
720 *Biophys Acta* **1144**: 177-183.
- 721 Willett CS, Burton RS (2003). Environmental influences on epistatic interactions:  
722 viabilities of cytochrome c genotypes in interpopulation crosses. *Evolution* **57**: 2286-  
723 2292.
- 724 Wilton PR, Sloan DB, Logsdon Jr JM, Doddapaneni H, Neiman M (2013). Characterization of  
725 transcriptomes from sexual and asexual lineages of a New Zealand snail (*Potamopyrgus*  
726 *antipodarum*). *Mol Ecol Res* **13**: 289-294.
- 727 Zachar N, Neiman M. (2013). Profound effects of population density on fitness-  
728 related traits in an invasive freshwater snail. *PLoS One* **8**: e80067.
- 729 Zhang F, Broughton RE (2013). Mitochondrial-nuclear interactions: compensatory  
730 evolution or variable functional constraint among vertebrate oxidative phosphorylation  
731 genes? *Gen Biol Evol* **5**: 1781-1791.

# *cytB* copies / # *rad21* copies

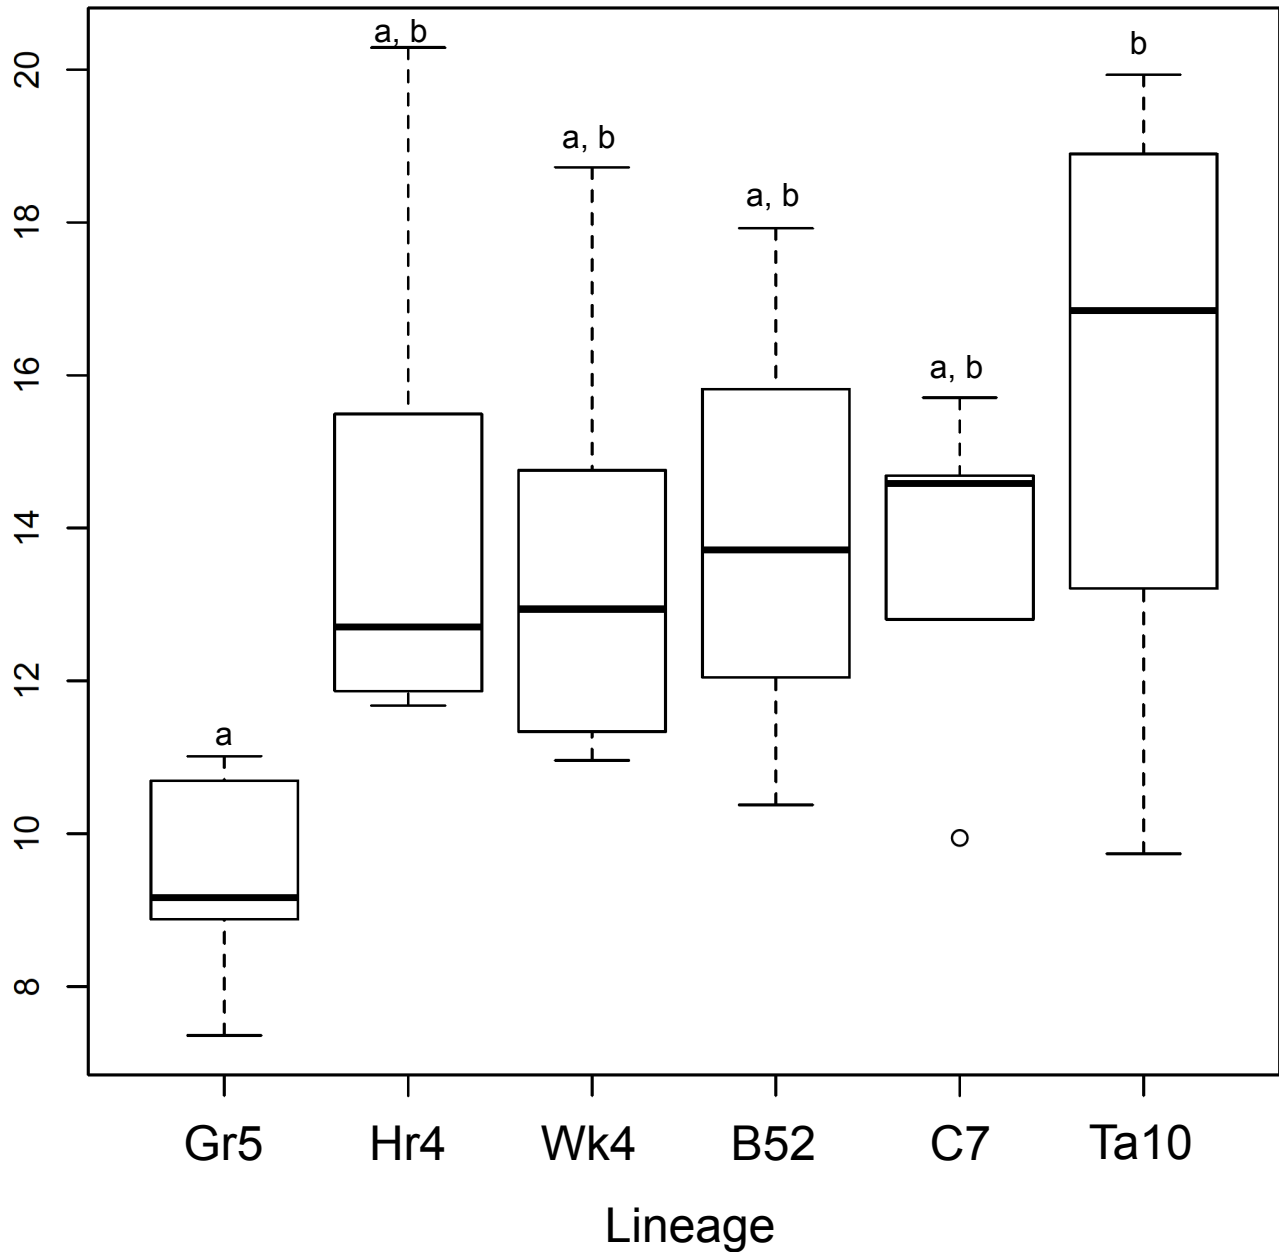

Log-transformed Median Red: Green

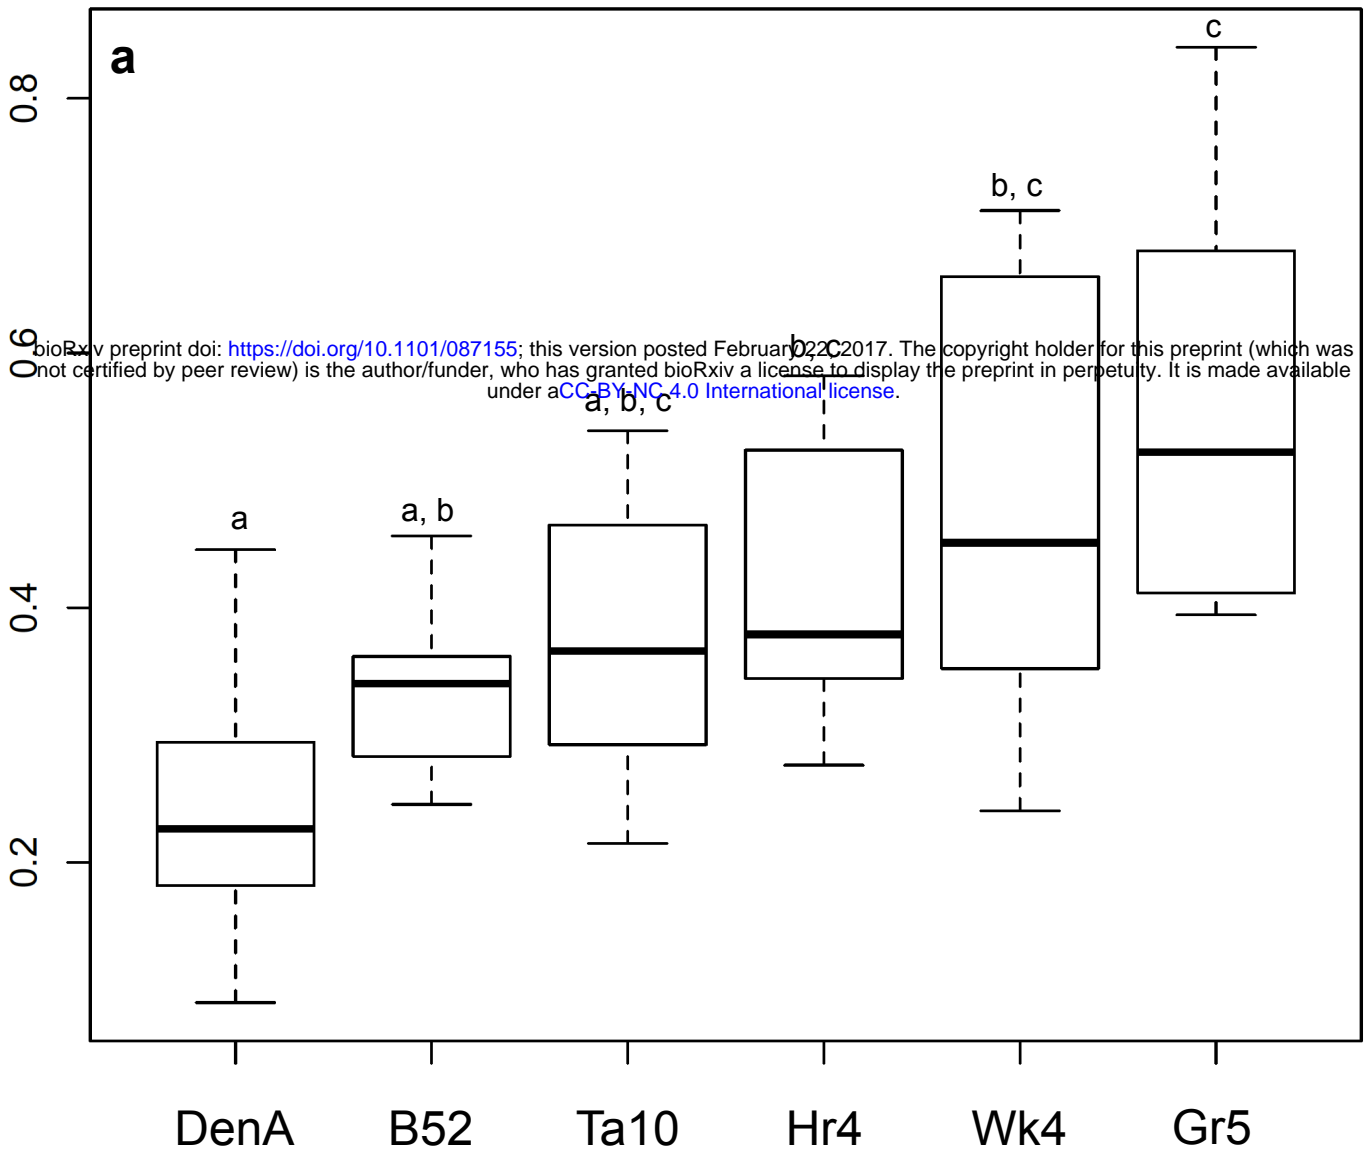

Log-transformed MTT Reduction

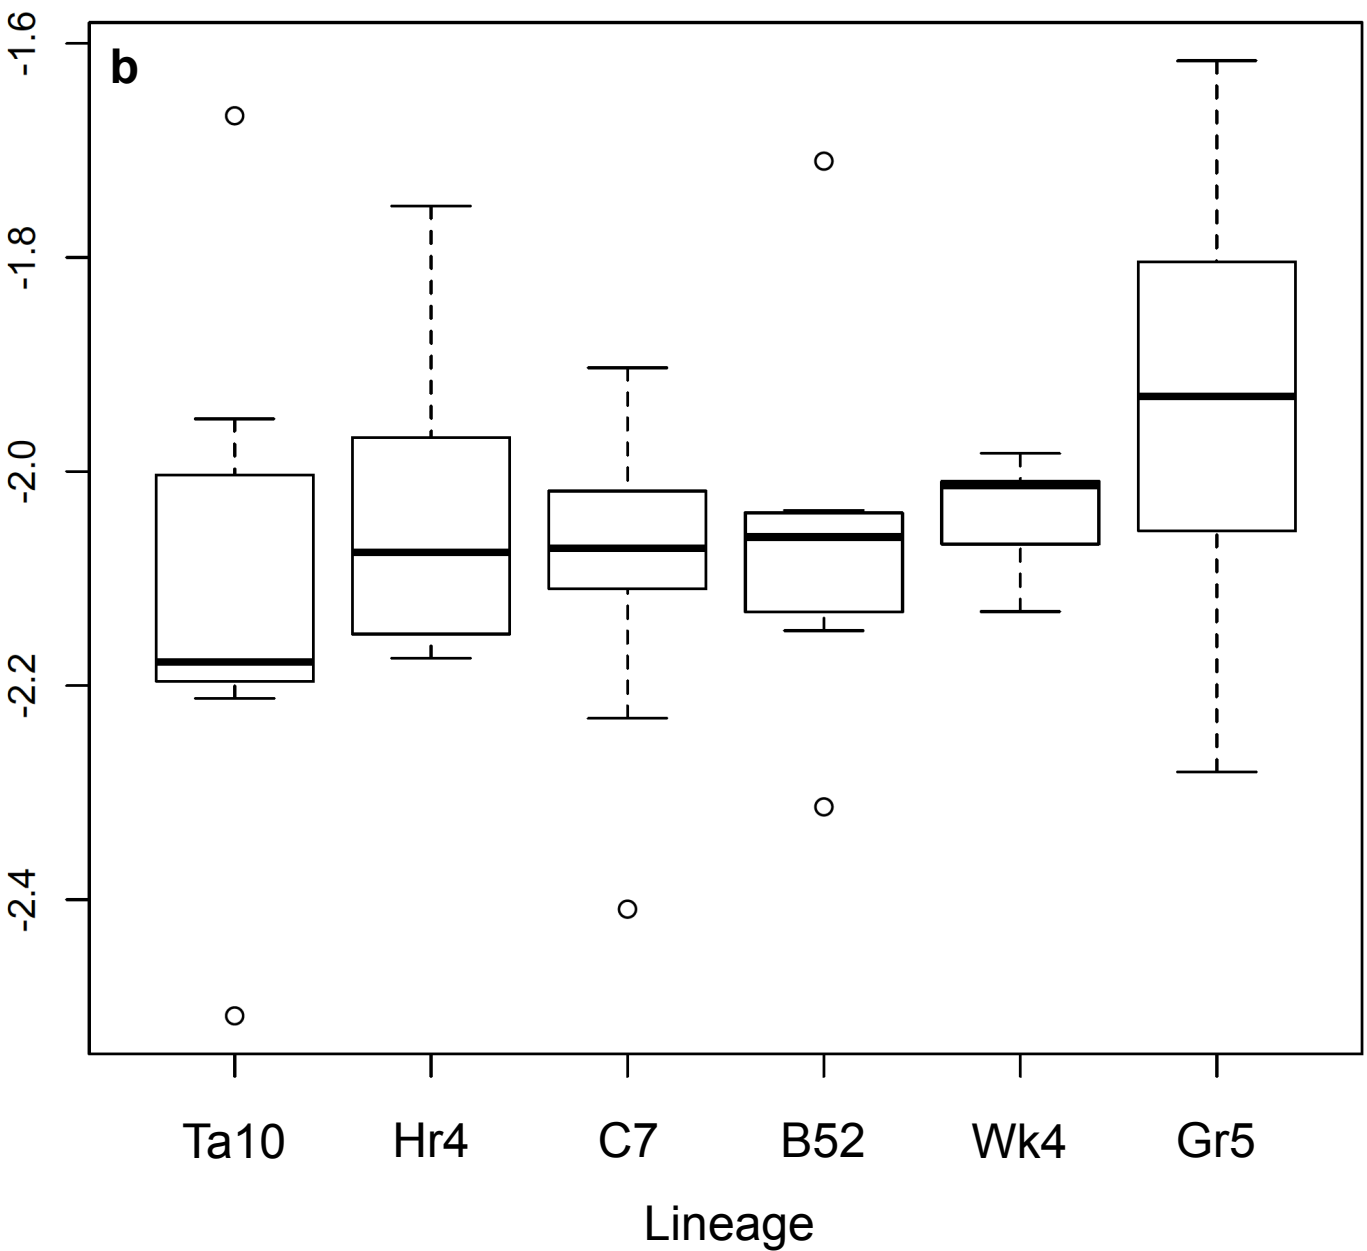

O<sub>2</sub> Consumption (residuals)

5.5  
5.0  
4.5  
4.0  
3.5

Ta10  
Hr4  
Gr5  
C7  
Wk4  
B52  
Gn5

16C

22C

30C

Temperature (°C)

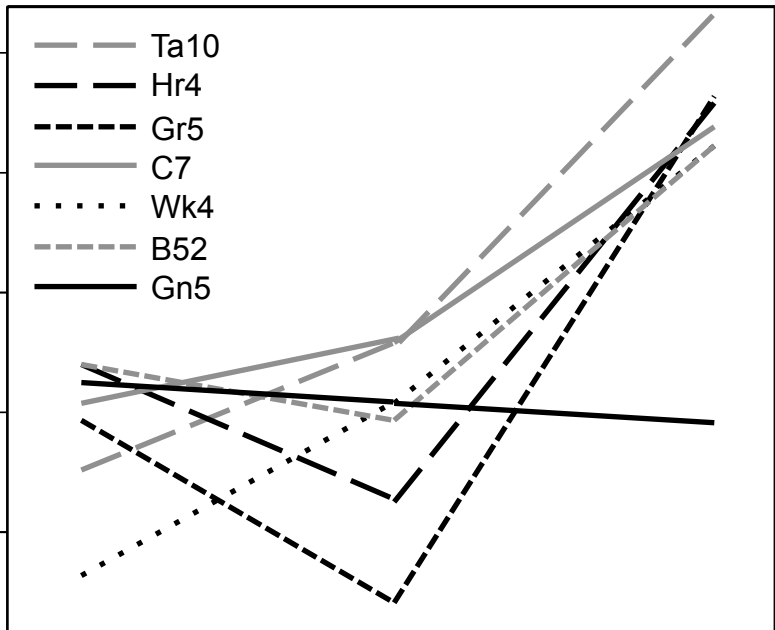

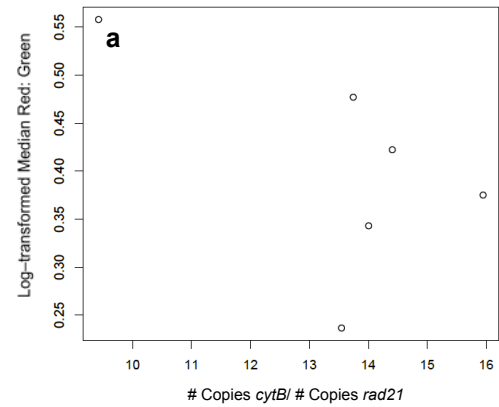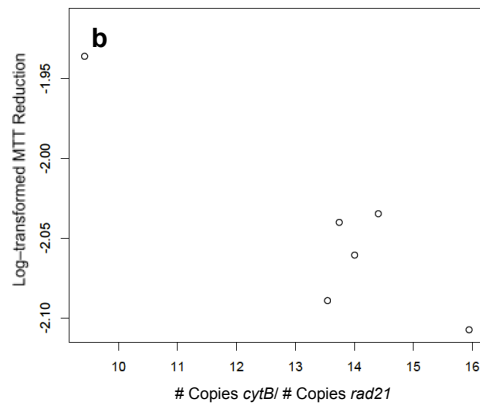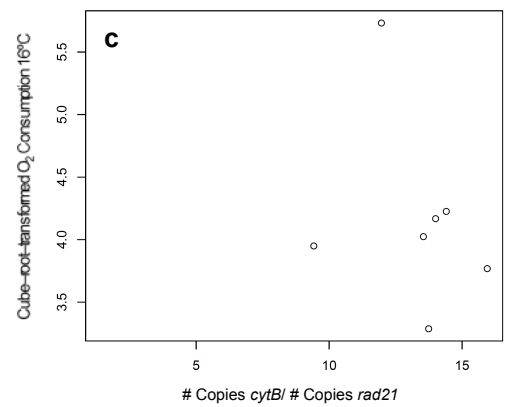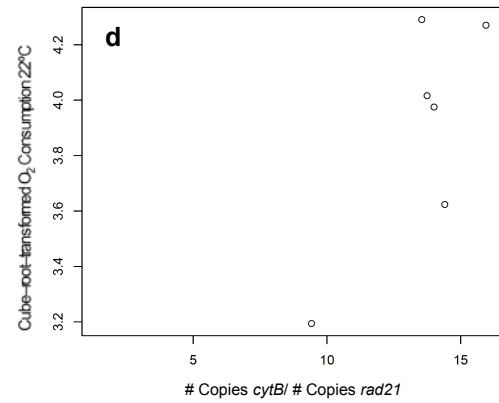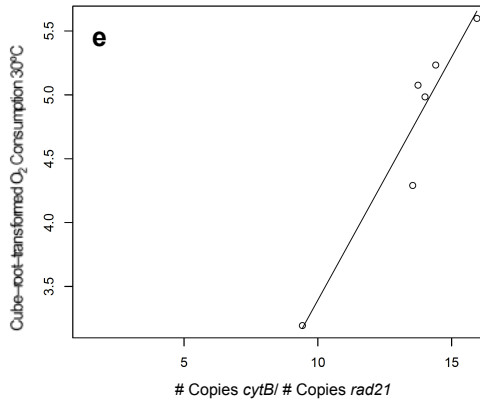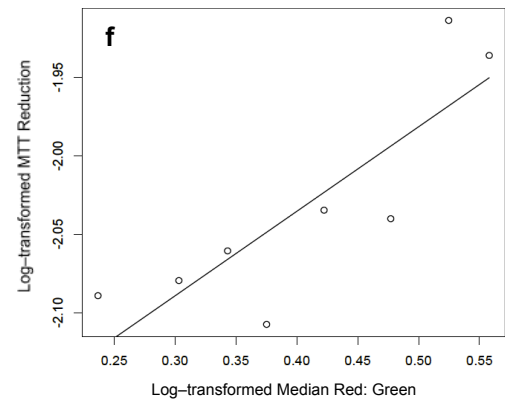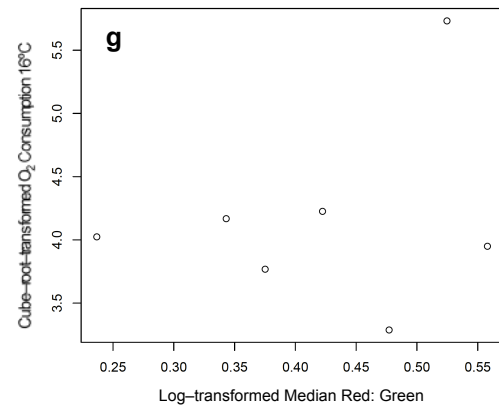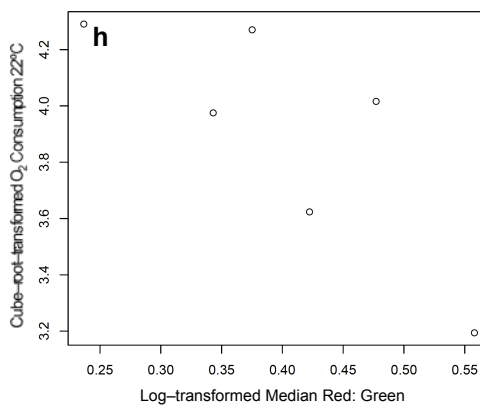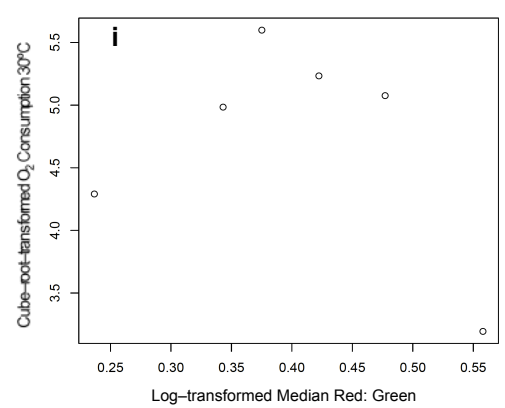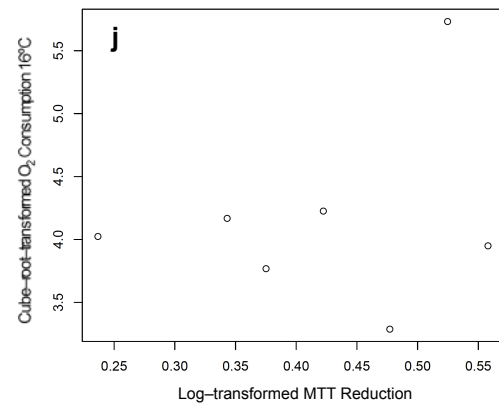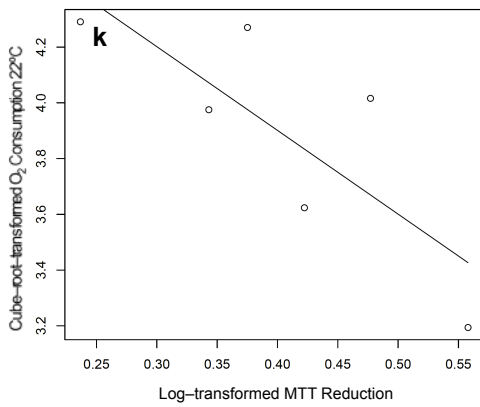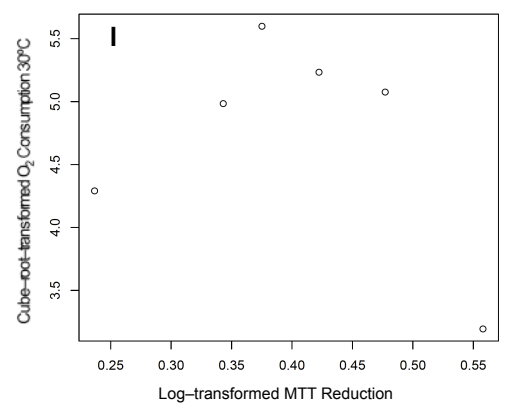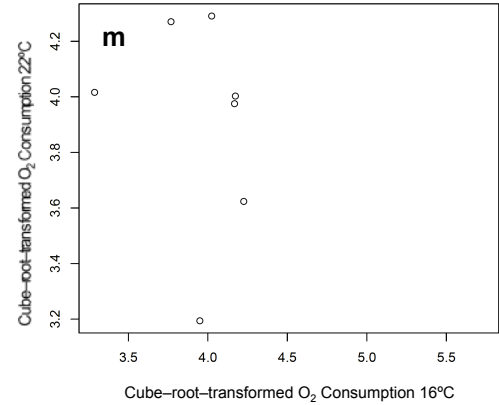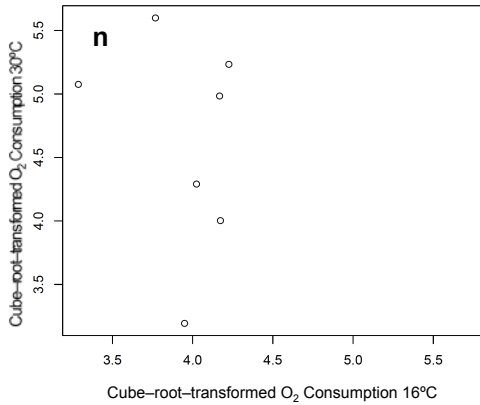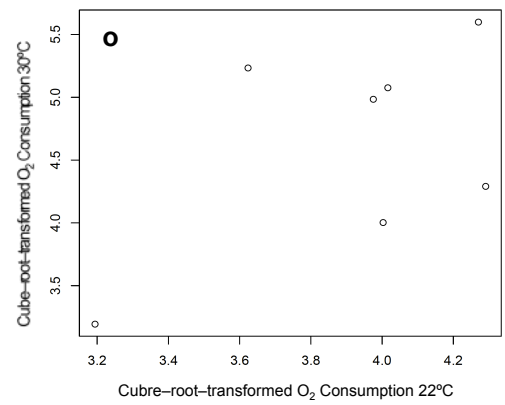

Source: http://biorxiv.org/content/10.1101/087155v2.full.pdf
